# Supplementary material for: Genome Mining Discovery of a New Benzazepine Alkaloid Pseudofisnin A from the Marine Fungus Neosartorya pseudofischeri F27-1
Source: MDPI journal article supplement (doi:10.3390/antibiotics11101444), 2022-10-20

# Supporting Information

## **Genome Mining Discovery of a New Benzazepine Alkaloid Pseudofisinin A from the Marine Fungus *Neosartorya pseudofischeri* F27-1**

Xiao-Xin Xue<sup>1</sup>, Lin Chen<sup>1</sup>, and Man-Cheng Tang<sup>1,2,\*</sup>

<sup>1</sup> State Key Laboratory of Microbial Metabolism, School of Life Sciences and Biotechnology, Shanghai Jiao Tong University, Shanghai 200240, China

<sup>2</sup> Zhangjiang Institute for Advanced Study, Shanghai Jiao Tong University, Shanghai 200240, China

\*Correspondence: tangmc@sjtu.edu.cn

## Table of contents

|                                                                                                              |           |
|--------------------------------------------------------------------------------------------------------------|-----------|
| <b>SUPPLEMENTART TABLES.....</b>                                                                             | <b>S3</b> |
| Table S1. Bioinformatics analysis of the <i>pse</i> gene cluster. ....                                       | S3        |
| Table S2. Primers used in this study. ....                                                                   | S3        |
| Table S3. Plasmids used in this study. ....                                                                  | S4        |
| Table S4. NMR data of nanangelenin B ( <b>3</b> ) in DMSO- <i>d</i> <sub>6</sub> . ....                      | S5        |
| Table S5. NMR data of pseudofisnin B ( <b>2</b> ) in CDCl <sub>3</sub> . ....                                | S6        |
| Table S6. NMR data of pseudofisnin A ( <b>1</b> ) in CDCl <sub>3</sub> . ....                                | S7        |
| <b>SUPPLEMENTART FIGURES.....</b>                                                                            | <b>S8</b> |
| Figure S1. SDS-PAGE analysis of purified PseC. ....                                                          | S8        |
| Figure S2. Kinetic analysis of the methylation reaction catalyzed by PseC. ....                              | S8        |
| Figure S3. HR-ESIMS of (a) pseudofisnin B and (b) pseudofisnin A. ....                                       | S9        |
| Figure S4. <sup>1</sup> H NMR spectrum of nanangelenin B ( <b>3</b> ) in DMSO- <i>d</i> <sub>6</sub> . ....  | S100      |
| Figure S5. <sup>13</sup> C NMR spectrum of nanangelenin B ( <b>3</b> ) in DMSO- <i>d</i> <sub>6</sub> . .... | S100      |
| Figure S6. DEPT 135 spectrum of nanangelenin B ( <b>3</b> ) in DMSO- <i>d</i> <sub>6</sub> . ....            | S111      |
| Figure S7. <sup>1</sup> H NMR spectrum of pseudofisnin B ( <b>2</b> ) in CDCl <sub>3</sub> . ....            | S111      |
| Figure S8. <sup>13</sup> C NMR spectrum of pseudofisnin B ( <b>2</b> ) in CDCl <sub>3</sub> . ....           | S122      |
| Figure S9. DEPT 135 spectrum of pseudofisnin B ( <b>2</b> ) in CDCl <sub>3</sub> . ....                      | S122      |
| Figure S10. COSY spectrum of pseudofisnin B ( <b>2</b> ) in CDCl <sub>3</sub> . ....                         | S133      |
| Figure S11. HSQC spectrum of pseudofisnin B ( <b>2</b> ) in CDCl <sub>3</sub> . ....                         | S133      |
| Figure S12. HMBC spectrum of pseudofisnin B ( <b>2</b> ) in CDCl <sub>3</sub> . ....                         | S134      |
| Figure S13. <sup>1</sup> H NMR spectrum of pseudofisnin A ( <b>1</b> ) in CDCl <sub>3</sub> . ....           | S134      |
| Figure S14. <sup>13</sup> C NMR spectrum of pseudofisnin A ( <b>1</b> ) in CDCl <sub>3</sub> . ....          | S135      |
| Figure S15. DEPT 135 spectrum of pseudofisnin A ( <b>1</b> ) in CDCl <sub>3</sub> . ....                     | S135      |
| Figure S16. COSY spectrum of pseudofisnin A ( <b>1</b> ) in CDCl <sub>3</sub> . ....                         | S136      |
| Figure S17. HSQC spectrum of pseudofisnin A ( <b>1</b> ) in CDCl <sub>3</sub> . ....                         | S136      |
| Figure S18. HMBC spectrum of pseudofisnin A ( <b>1</b> ) in CDCl <sub>3</sub> . ....                         | S13       |

## SUPPLEMENTART TABLES

**Table S1.** Bioinformatics analysis of the *pse* gene cluster.

| Genes                      | Proteins | Gene size (bp/aa) | Putative Function               |
|----------------------------|----------|-------------------|---------------------------------|
| <i>pseA</i> (XP_026618556) | PseA     | 7523/2381         | NRPS                            |
| <i>pseB</i> (XP_026618558) | PseB     | 1315/415          | Indoleamine 2,3-dioxygenase     |
| <i>pseC</i> (XP_026618557) | PseC     | 1407/384          | Methyltransferase               |
| <i>pseD</i> (XP_026618560) | PseD     | 1236 /411         | flavine-dependent monooxygenase |
| <i>pseE</i> (XP_026618559) | PseE     | 879/292           | Hypothetical protein            |
| <i>pseF</i> (XP_026618554) | PseF     | 387/128           | Blasticidin-S deaminase         |
| <i>pseG</i> (XP_026618553) | PseG     | 1185/394          | UbiH type hydroxylase           |

**Table S2.** Primers used in this study.

| Primer name             | Primer sequence (5'→3')                                        |
|-------------------------|----------------------------------------------------------------|
| AmyB_5'- <i>pseA</i> -F | CCCTTCTCTGAACAATAAACCCACAGAAGGCATTTATGGACAAC<br>TGTAAGATGCCG   |
| <i>pseA</i> -1-R        | CAGACCACTCTGCACTGATAAG                                         |
| <i>pseA</i> -2-F        | CATCCAAGACGCATATCCTTG                                          |
| <i>pseA</i> -2-R        | AATATCGTCACACACCACGAC                                          |
| <i>pseA</i> -3-F        | CCATCATCGCATCTACAAGACG                                         |
| <i>glaA-pseA</i> -R     | CGACCAGTTCGGAAGATCAGGCTTGGTCCACTGAGGAAGATG                     |
| <i>pseA-glaA</i> -F     | CATCTTCCTCAGTGGACCAAGCCTGATCTTCCGAAGTGGTCG                     |
| <i>pseF-glaA</i> -R     | CCTCGGGGGTGAGGGGCATTGCTGAGGTGTAATGATGCTG                       |
| <i>glaA-pseF</i> -F     | CAGCATCATTACACCTCAGCAATGCCCCTCACCCCCGAGG                       |
| <i>pseF</i> -pYTP-R     | GTGATGAGACCCAACAACCATGATACCAGGGGATTTGTTCTTCTTG<br>AGCGTTGCACAG |
| <i>glaA-pseD</i> -F     | CCTGAGCTTCATCCCCAGCATCATTACACCTCAGCAATGACGGTCA<br>TCGACCAGGTC  |
| AmyB- <i>pseD</i> _5'-R | GCTCGTTCGGCACCTTTAATCTCTCTGGAATGGACATACGCTC                    |
| <i>pseD</i> -AmyB_5'-F  | GAGCGTATGTCCATTCCAGAGAGATTAAAGGTGCCGAACGAGC                    |
| <i>pseB</i> -AmyB_5'-R  | GATCCCTCCGAGTCCTGGCATAAATGCCTTCTGTGGGGTTTATTG                  |
| AmyB_5'- <i>pseB</i> -F | CAATAAACCCACAGAAGGCATTTATGCCAGGACTCGGAGGGATC                   |
| <i>pseB</i> -pYTU-R     | ACAGTGGAGGACATACCCGTAATTTTCTGGGCATTGGTTCGACGAT<br>GCCATTGATGTG |
| <i>gpdA-pseE</i> -F     | ctaaccattacccgccacatagacacatctaaacaATGTCGACAACTCCCACCACG       |
| AmyB_5'- <i>pseE</i> -R | GCTCGTTCGGCACCTTTAATCAGCCAGCCTGCTTGAGTTGAAG                    |
| <i>pseE</i> -AmyB_5'-F  | CTTCAACTCAAGCAGGCTGGCTGATTAAAGGTGCCGAACGAGC                    |
| <i>pseC</i> -AmyB_5'-R  | CTGGCTAATTTCCCGTGTCTATAAATGCCTTCTGTGGGGTTTATTG                 |
| AmyB_5'- <i>pseC</i> -F | CAATAAACCCACAGAAGGCATTTATGACACGGGAAATTAGCCAG                   |
| <i>glaA-pseC</i> -F     | CGACCAGTTCGGAAGATCAGGAGAAACATATGGTCATGGCTGC                    |
| <i>pseC-glaA</i> -F     | GCAGCCATGACCATATGTTTCTCCTGATCTTCCGAAGTGGTCG                    |
| <i>pseG-glaA</i> -R     | CCTCGGGGGTGAGGGGCATTGCTGAGGTGTAATGATGCTG                       |

|                      |                                                                |
|----------------------|----------------------------------------------------------------|
| <i>glaA-pseG-F</i>   | CCAGCATCATTACACCTCAGCAATGCCCCAACCCCGAATCG                      |
| <i>pseG-pYTR-R</i>   | CTAAAGGGTATCATCGAAAGGGAGTCATCCAATTTGTTGATCTGCG<br>GTGAGAGATTG  |
| <i>pseA--pYTP-R</i>  | TGATGAGACCCAACAACCATGATACCAGGGGATTTCTTGGTCCAC<br>TGAGGAAGATG   |
| <i>glaA-pseB-F</i>   | CTGAGCTTCATCCCCAGCATCATTACACCTCAGCAATGCCAGGACT<br>CGGAGGGATC   |
| <i>pseB-pYTR-R</i>   | ACAGTGGAGGACATACCCGTAATTTTCTGGGCATTTGGTCGACGAT<br>GCCATTGATGTG |
| <i>gpdA-pseC-F</i>   | taaccattaccccgccacatagacacatctaacaATGACACGGGAAATTAGCCAG        |
| <i>pseC-pYTU-R</i>   | CTAAAGGGTATCATCGAAAGGGAGTCATCCAATTTAGAAACATATG<br>GTCATGGCTGC  |
| <i>pET28a-pseC-F</i> | GTGCCGCGCGGCAGCCATATGATGACACGGGAAATTAGCCAG                     |
| <i>pseC-1-R</i>      | CCTCCCGCAACGCACATCTGAGTAGGGACCTTGAAGCC                         |
| <i>pseC-2-F</i>      | GGCTTCAAGGTCCCTACTCAGATGTGCGTTGCGGGAGG                         |
| <i>pseC-2-R</i>      | GTCATGAGACCAACATCGGACATATGATGGACCCACGCGCCTC                    |
| <i>pseC-3-F</i>      | GAGGCGCGTGGGTCCATCATATGTCCGATGTTGGTCTCATGAC                    |
| <i>pseC-3-R</i>      | GAAAGCGTAGAAAGATTGGTCCGTCCGGTACGCCATCTGAAACG                   |
| <i>pseC-4-F</i>      | CGTTTCAGATGGCGTACCGGACGGACCAATCTTTCTACGCTTTC                   |
| <i>pseC-4-R</i>      | CCTAGGATGGTGCAACAGTCCCTCTGAAGTATGGTCCATCAGGATG                 |
| <i>pseC-5-F</i>      | CATCCTGATGGACCATACTTCAGAGGACTGTTGCACCATCCTAGG                  |
| <i>pET28a-pseC-R</i> | ACGGAGCTCGAATTCGGATCCCTAGCCCACTCTCTTCAGAGC                     |

**Table S3.** Plasmids used in this study.

| Plasmids | Vector | Genes                                                       |
|----------|--------|-------------------------------------------------------------|
| pXXX1-1  | pYTP   | <i>AmyB_5'-pseA</i> ; <i>glaA-pseF</i>                      |
| pXXX1-2  | pYTU   | <i>AmyB_5'-pseB</i> ; <i>glaA-pseD</i>                      |
| pXXX1-3  | pYTR   | <i>GpdA-pseE</i> ; <i>AmyB_5-pseC</i> ;<br><i>GlaA-pseG</i> |
| pXXX1-4  | pYTP   | <i>AmyB_5'-pseA</i>                                         |
| pXXX1-5  | pYTU   | <i>glaA-pseB</i>                                            |
| pXXX1-6  | pYTR   | <i>GpdA-pseC</i>                                            |
| pXXX1-7  | pET28a | T7p-N-his- <i>pseC</i> -T7t                                 |

**Table S4.** NMR data of nanangelenin B (**3**) in DMSO-*d*<sub>6</sub>.

<sup>1</sup>H NMR spectrum (600 MHz), <sup>13</sup>C NMR spectrum (150 MHz)

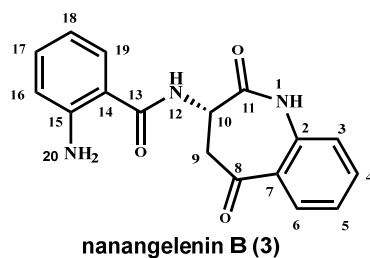

| No. | $\delta_{\text{H}}$ ( <i>J</i> in Hz)         | $\delta_{\text{C}}$ , type |
|-----|-----------------------------------------------|----------------------------|
| 1   | 10.36, s                                      |                            |
| 2   |                                               | 137.7, C                   |
| 3   | 7.26, t (7.8)                                 | 124.3, CH                  |
| 4   | 7.61, m                                       | 134.2, CH                  |
| 5   | 7.19, d (8.1)                                 | 122.2, CH                  |
| 6   | 7.75, dd (7.9, 1.7)                           | 130.0, CH                  |
| 7   |                                               | 128.4, C                   |
| 8   |                                               | 197.8, C                   |
| 9   | 3.02, dd (18.7, 2.7)<br>3.26, dd (18.7, 13.3) | 45.8, CH <sub>2</sub>      |
| 10  | 5.00, ddd (13.3, 7.5, 2.7)                    | 46.1, CH                   |
| 11  |                                               | 171.2, C                   |
| 12  | 8.42, d (7.4)                                 |                            |
| 13  |                                               | 168.6, C                   |
| 14  |                                               | 113.9, C                   |
| 15  |                                               | 149.7, C                   |
| 16  | 6.70, d (8.2)                                 | 116.4, CH                  |
| 17  | 7.16, m                                       | 132.1, CH                  |
| 18  | 6.54, t (7.5)                                 | 114.6, CH                  |
| 19  | 7.58, dd (8.0, 1.6)                           | 128.4, CH                  |
| 20  | 6.36, brs                                     |                            |

“m” means overlapped or multipet with other signals.

The NMR data of **1** is identical to the data reported in *J. Am. Chem. Soc.* 2020, 142(15), 7145-7152.

**Table S5.** NMR data of pseudofisnin B (**2**) in CDCl<sub>3</sub>.<sup>1</sup>H NMR spectrum (600 MHz), <sup>13</sup>C NMR spectrum (150 MHz)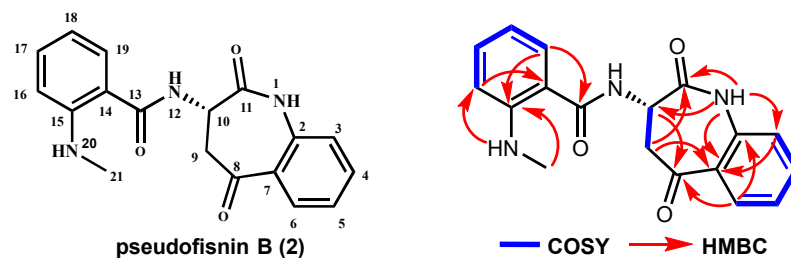

| No. | $\delta_{\text{H}}$ ( $J$ in Hz) | $\delta_{\text{C}}$ , type |
|-----|----------------------------------|----------------------------|
| 1   | 7.70, s                          |                            |
| 2   |                                  | 135.4, C                   |
| 3   | 7.00, d (8.0)                    | 122.1, CH                  |
| 4   | 7.56, t (7.7)                    | 134.4, CH                  |
| 5   | 7.32, t (7.7)                    | 126.2, CH                  |
| 6   | 7.93, d (8.0)                    | 131.2, CH                  |
| 7   |                                  | 129.8, C                   |
| 8   |                                  | 196.6, C                   |
| 9   | 3.04, dd (18.9, 12.9)            | 47.3, CH <sub>2</sub>      |
|     | 3.44, m                          |                            |
| 10  | 5.20, m                          | 46.5, CH                   |
| 11  |                                  | 171.7, C                   |
| 12  |                                  |                            |
| 13  |                                  | 169.0, C                   |
| 14  |                                  | 113.5, C                   |
| 15  |                                  | 150.9, C                   |
| 16  | 6.67, d (8.47)                   | 111.3, CH                  |
| 17  | 7.35, t (7.70)                   | 133.5, CH                  |
| 18  | 6.63, t (7.70)                   | 114.6, CH                  |
| 19  | 7.49, d (8.07)                   | 127.7, CH                  |
| 20  | 6.80, s                          |                            |
| 21  | 2.85, d (4.30)                   | 29.6, CH <sub>3</sub>      |

“m” means overlapped or multipet with other signals.

**Table S6.** NMR data of pseudofisnin A (**1**) in CDCl<sub>3</sub>.<sup>1</sup>H NMR spectrum (600 MHz), <sup>13</sup>C NMR spectrum (150 MHz)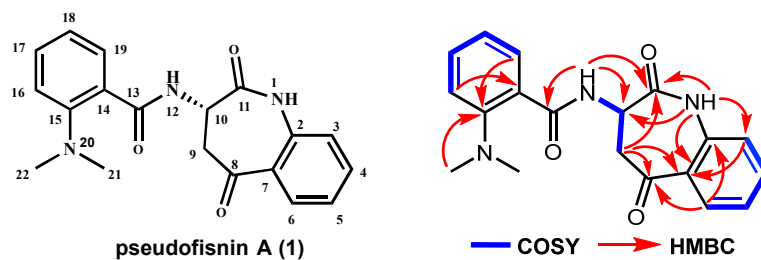

| No. | $\delta_{\text{H}}$ ( <i>J</i> in Hz)         | $\delta_{\text{C}}$ , type |
|-----|-----------------------------------------------|----------------------------|
| 1   | 7.69, s                                       |                            |
| 2   |                                               | 135.7, C                   |
| 3   | 6.99, d (8.0)                                 | 122.0, CH                  |
| 4   | 7.54, t (7.7)                                 | 134.3, CH                  |
| 5   | 7.31, t (7.7)                                 | 126.0, CH                  |
| 6   | 7.93, d (8.0)                                 | 131.1, CH                  |
| 7   |                                               | 130.1, C                   |
| 8   |                                               | 197.5, C                   |
| 9   | 3.07, dd (19.0, 12.9)<br>3.47, dd (19.0, 3.2) | 47.4, CH <sub>2</sub>      |
| 10  | 5.39, m                                       | 47.0, CH                   |
| 11  |                                               | 171.9, C                   |
| 12  | 11.06, d (6.30)                               |                            |
| 13  |                                               | 165.8, C                   |
| 14  |                                               | 126.7, C                   |
| 15  |                                               | 153.0, C                   |
| 16  | 7.27, d (8.0)                                 | 120.3, CH                  |
| 17  | 7.45, t (7.7)                                 | 132.4, CH                  |
| 18  | 7.19, t (7.7)                                 | 124.3, CH                  |
| 19  | 8.11, d (7.9)                                 | 131.4, CH                  |
| 20  |                                               |                            |
| 21  | 2.79, s                                       | 45.4, CH <sub>3</sub>      |
| 22  | 2.79, s                                       | 45.4, CH <sub>3</sub>      |

“m” means overlapped or multipet with other signals.

## SUPPLEMENTART FIGURES

**Figure S1.** SDS-PAGE analysis of purified PseC.

Left lane: protein marker; Right lane: the purified PseC (46.8 kDa).

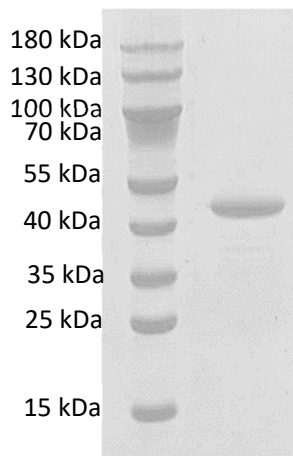

**Figure S2.** Kinetic analysis of the methylation reaction catalyzed by PseC.

(a) nanangelenin B (**3**) as the substrate; (b) pseudofisnin B (**2**) as the substrate.

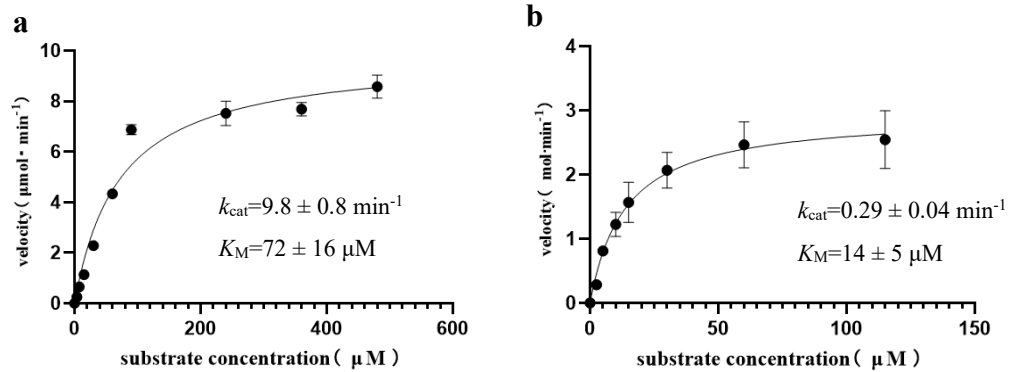

**Figure S3.** HR-ESIMS data of (a) pseudofisnin B and (b) pseudofisnin A.

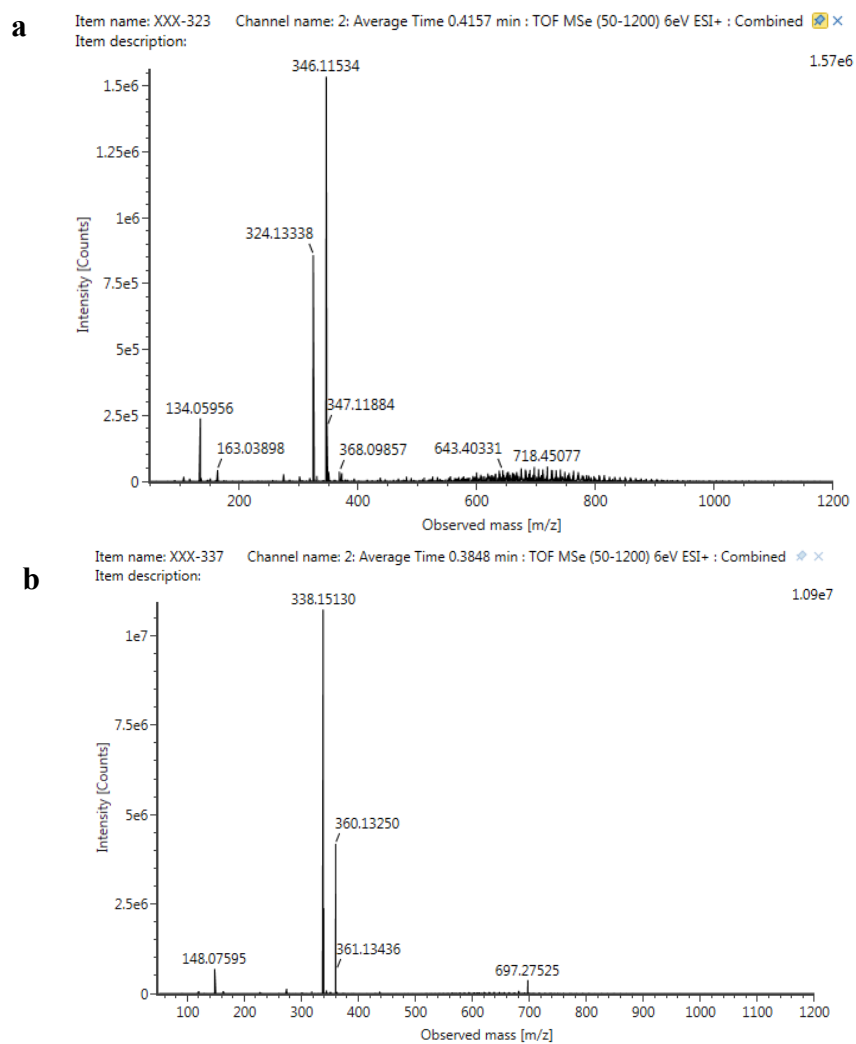

**Figure S4.**  $^1\text{H}$  NMR spectrum of nanangelenin B (**3**) in  $\text{DMSO}-d_6$ .

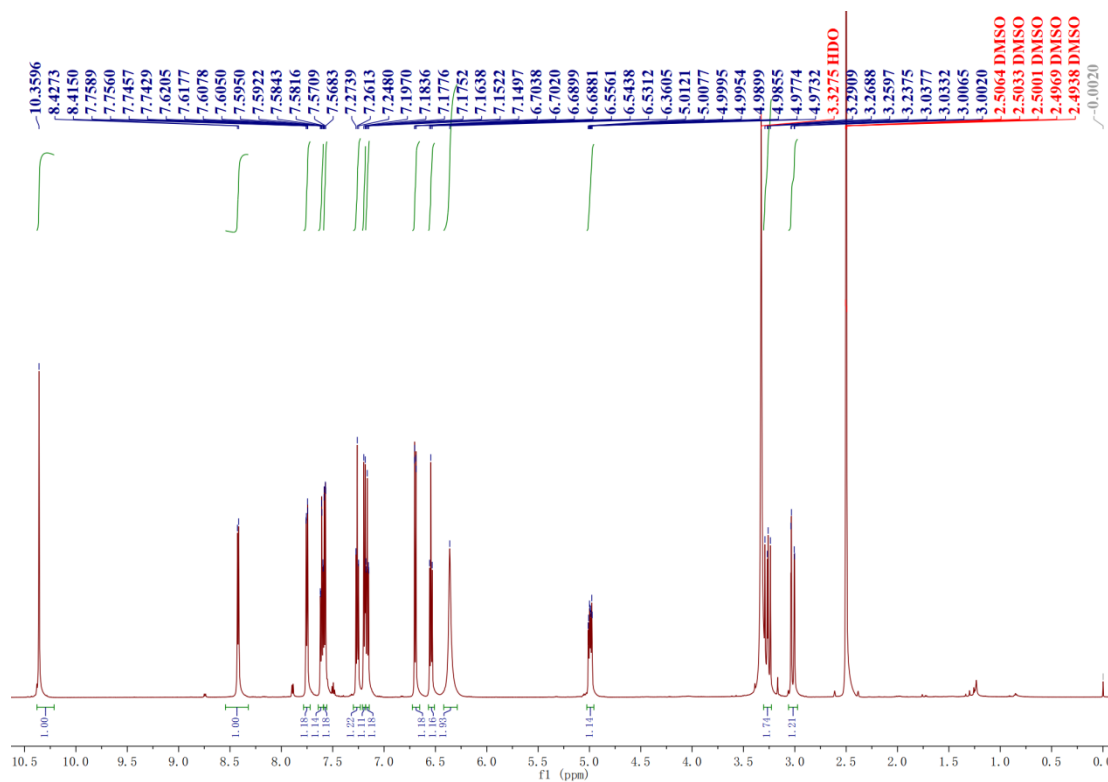

**Figure S5.**  $^{13}\text{C}$  NMR spectrum of nanangelenin B (**3**) in  $\text{DMSO}-d_6$ .

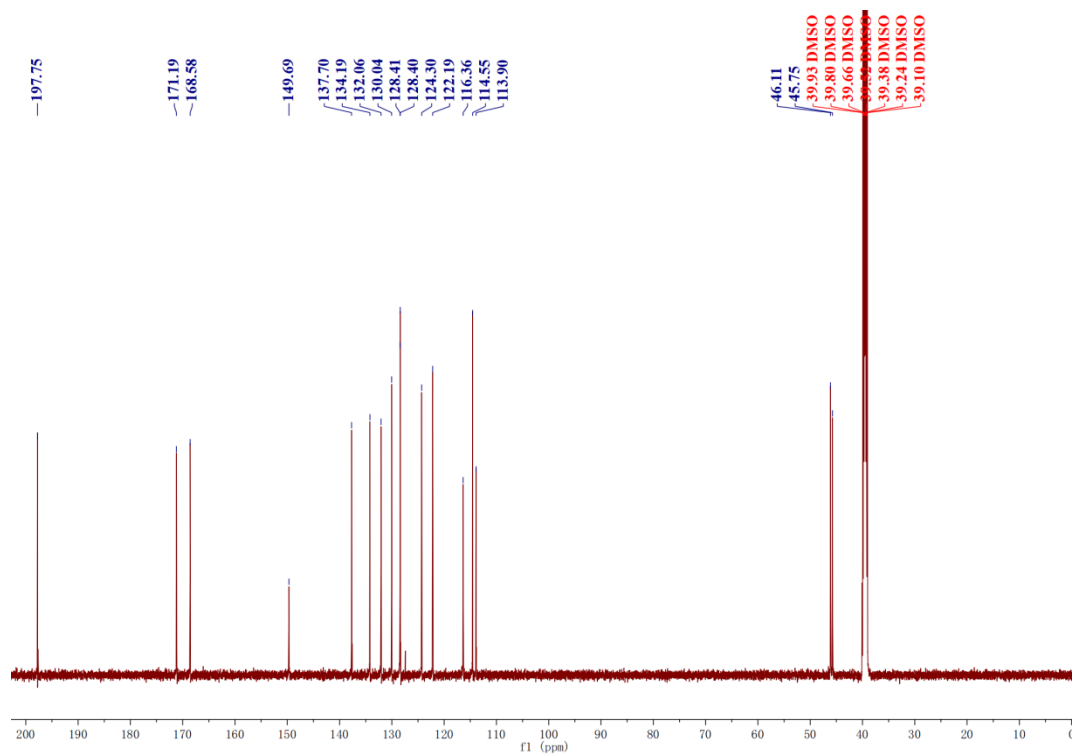

**Figure S6.** DEPT 135 spectrum of nanangelenin B (**3**) in DMSO-*d*<sub>6</sub>.

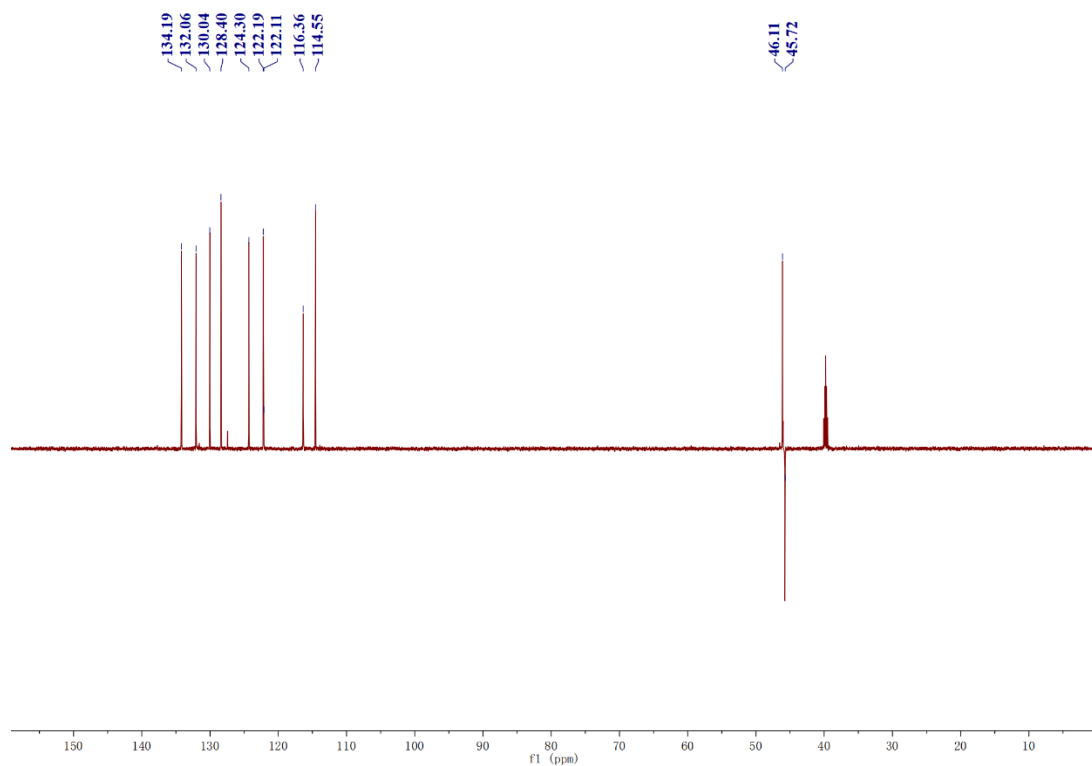

**Figure S7.** <sup>1</sup>H NMR spectrum of pseudofisnin B (**2**) in CDCl<sub>3</sub>.

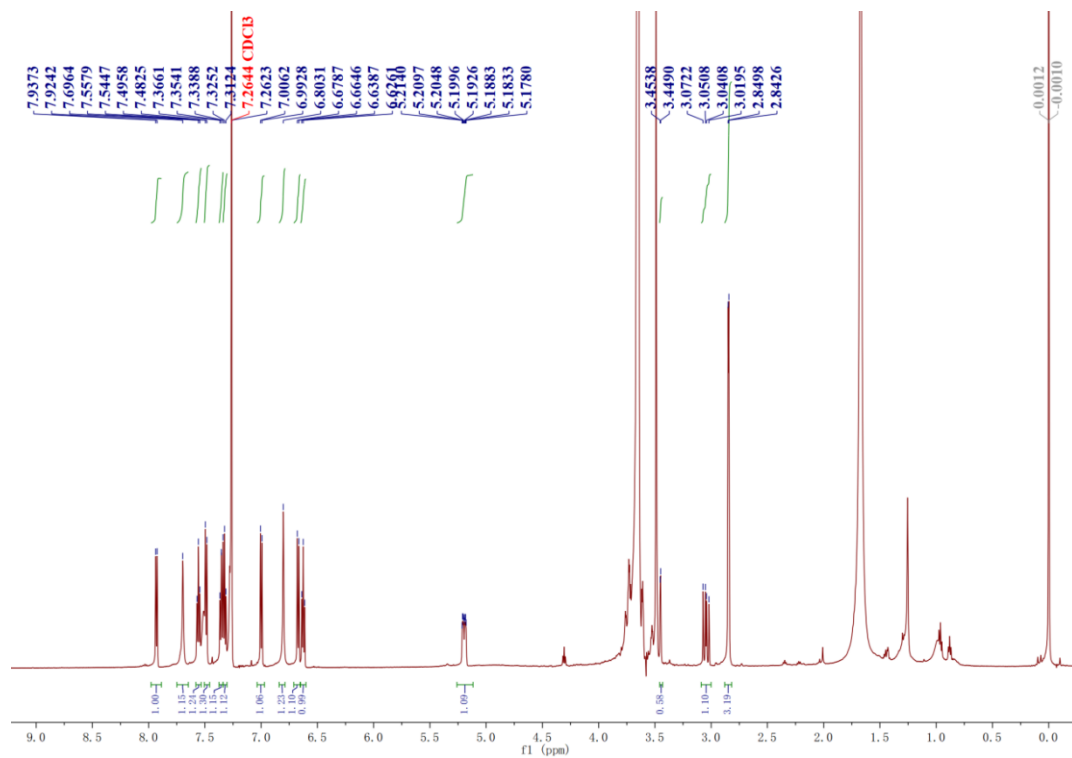

**Figure S8.**  $^{13}\text{C}$  NMR spectrum of pseudofisnin B (**2**) in  $\text{CDCl}_3$ .

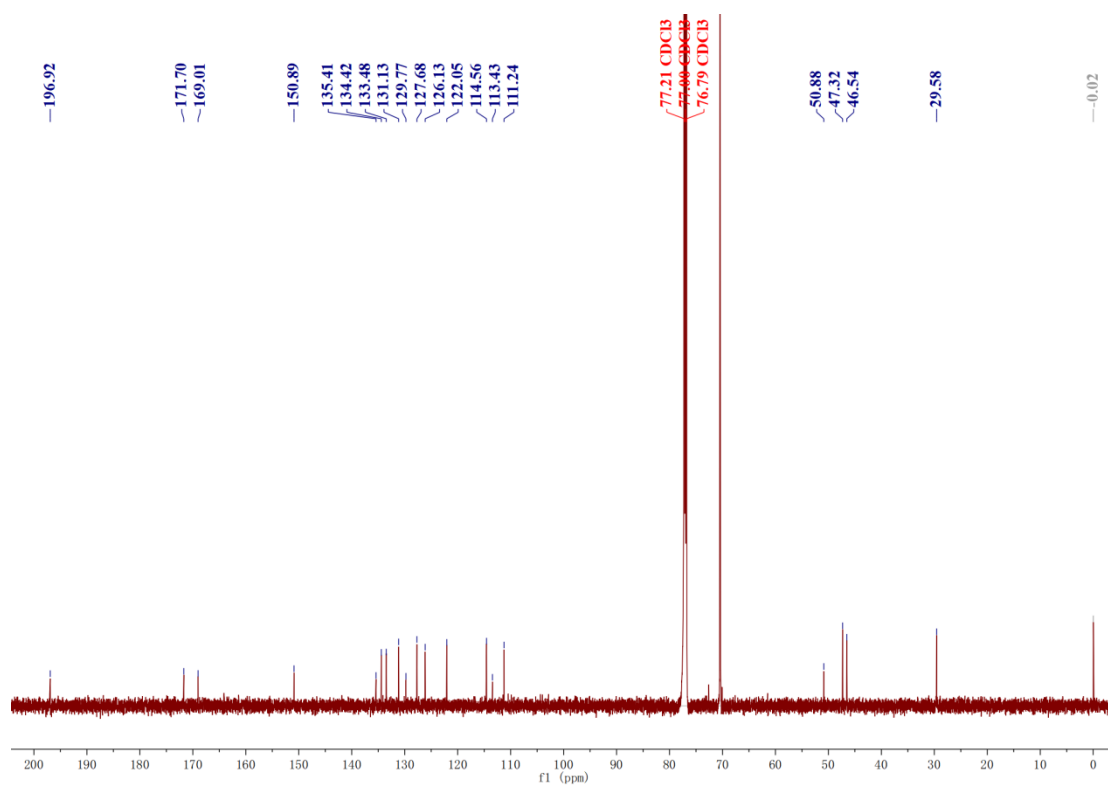

**Figure S9.** DEPT 135 spectrum of pseudofisnin B (**2**) in  $\text{CDCl}_3$ .

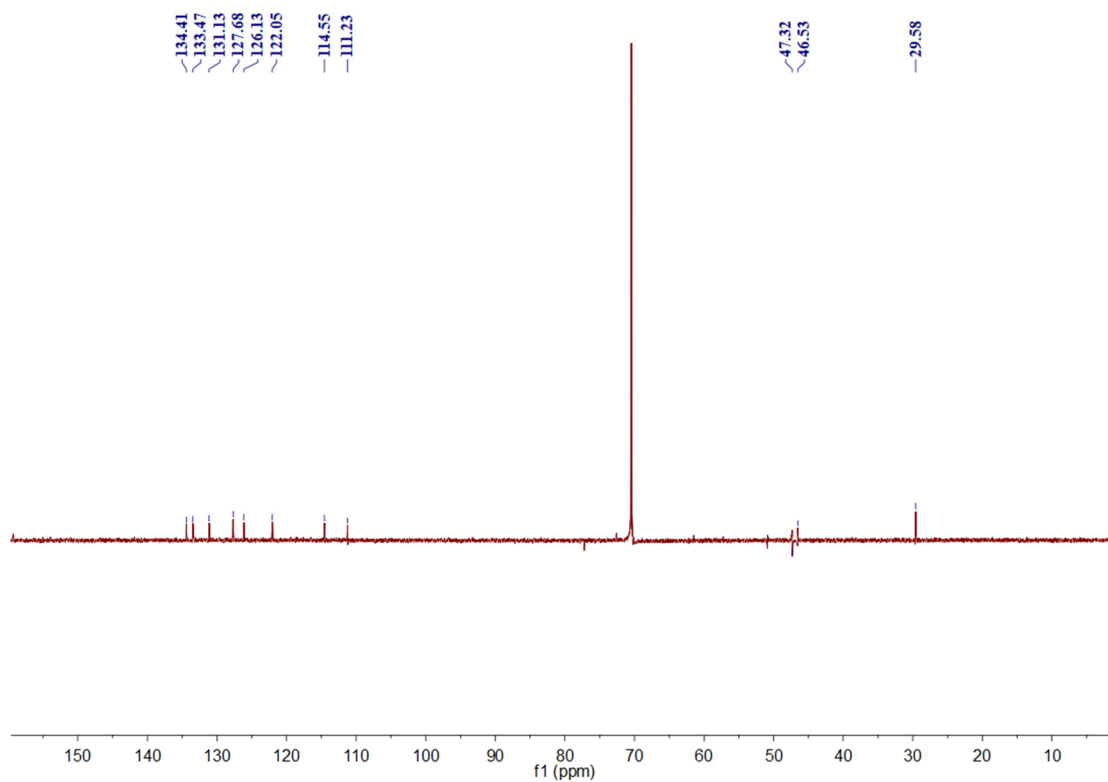

**Figure S10.** COSY spectrum of pseudofisinin B (**2**) in CDCl<sub>3</sub>.

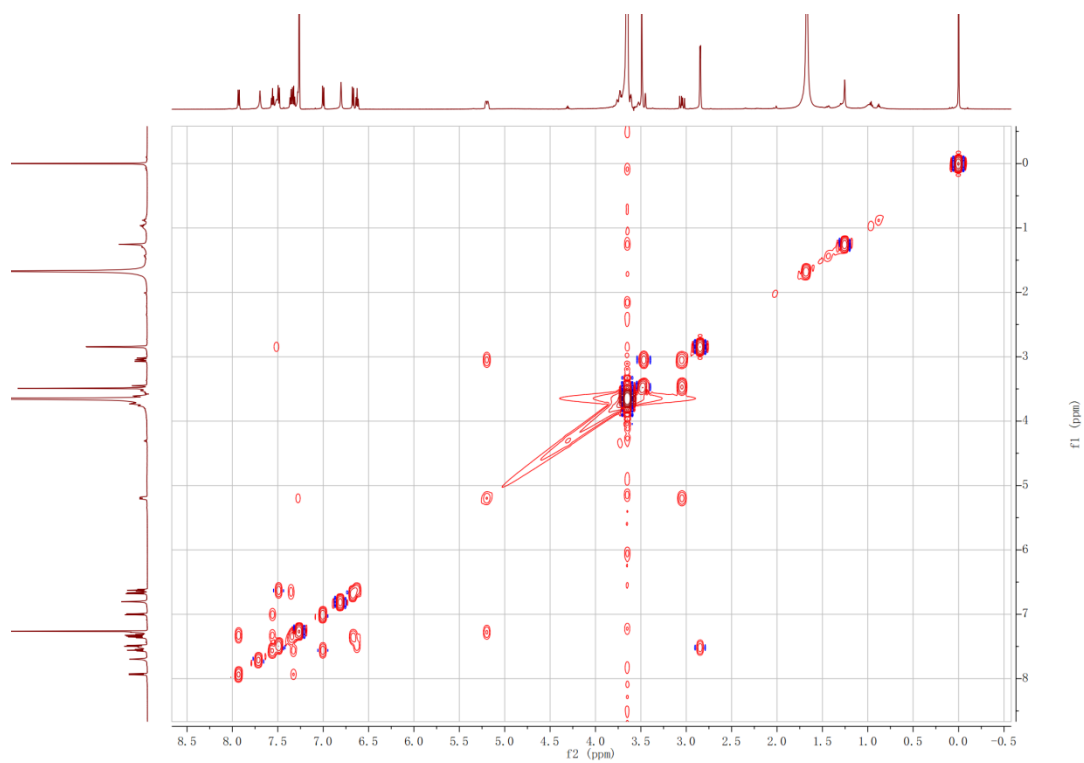

**Figure S11.** HSQC spectrum of pseudofisinin B (**2**) in CDCl<sub>3</sub>.

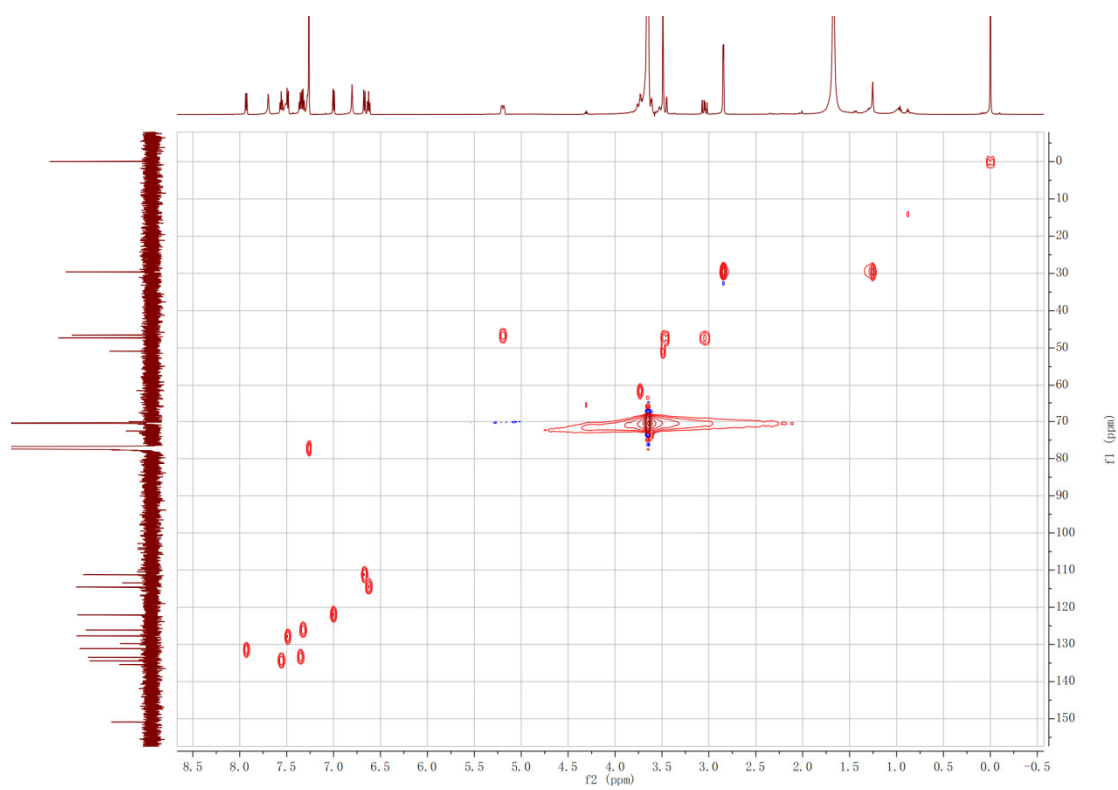

**Figure S12.** HMBC spectrum of pseudofisnin B (**2**) in CDCl<sub>3</sub>.

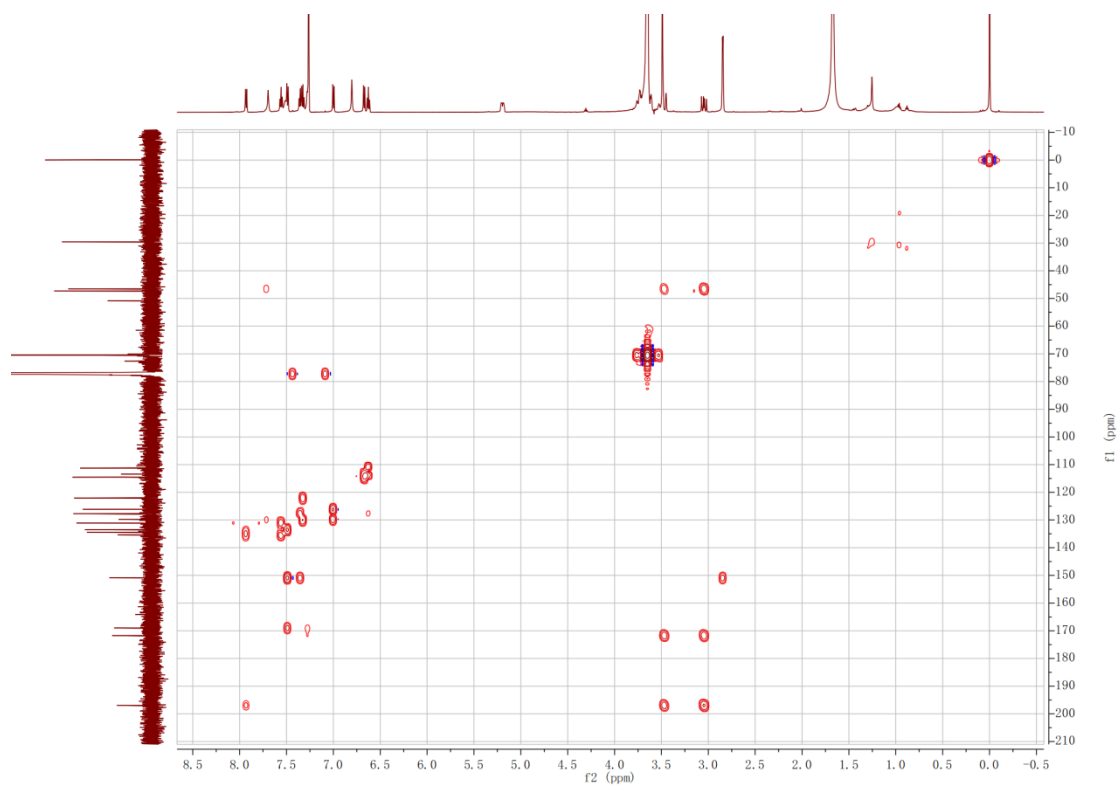

**Figure S13.** <sup>1</sup>H NMR spectrum of pseudofisnin A (**1**) in CDCl<sub>3</sub>.

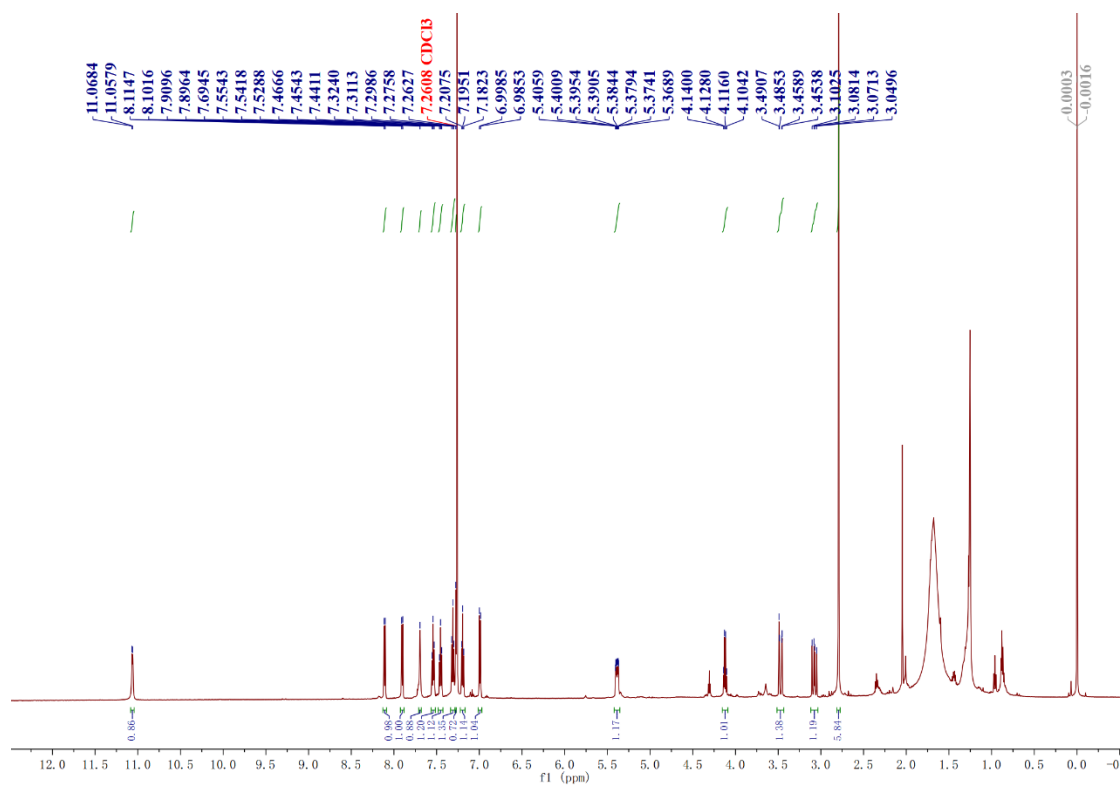

**Figure S14.**  $^{13}\text{C}$  NMR spectrum of pseudofisnin A (**1**) in  $\text{CDCl}_3$ .

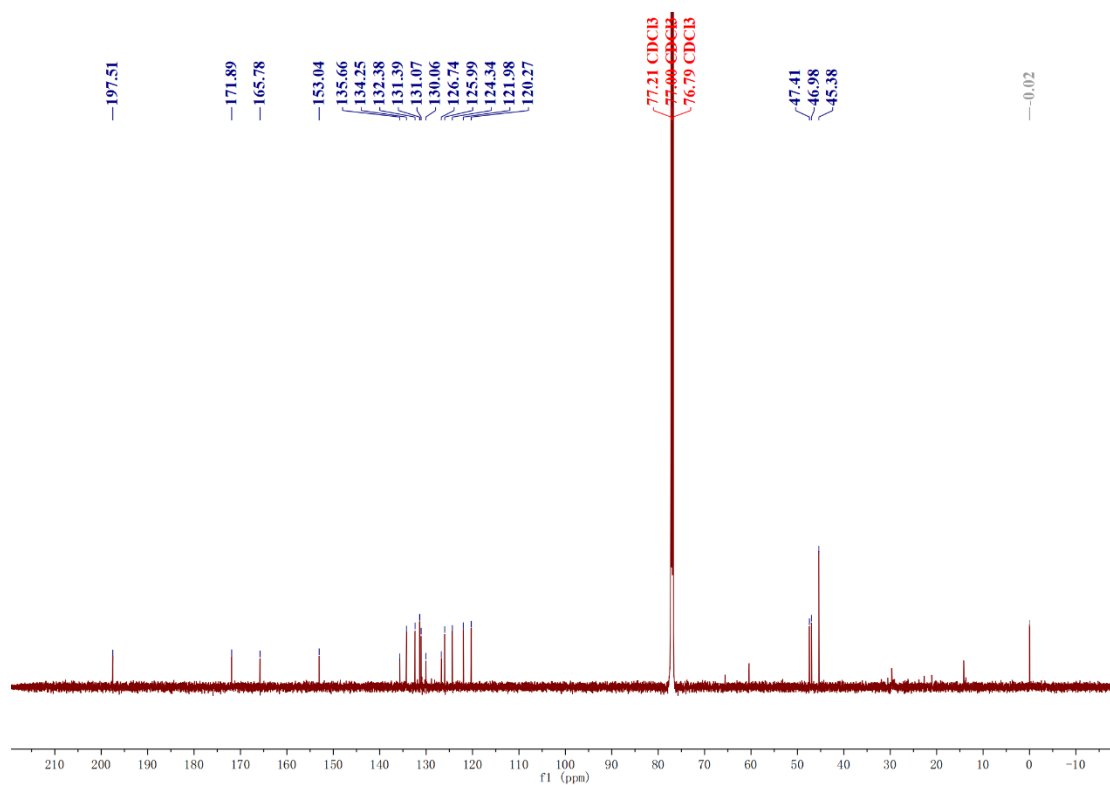

**Figure S15.** DEPT 135 spectrum of pseudofisnin A (**1**) in  $\text{CDCl}_3$ .

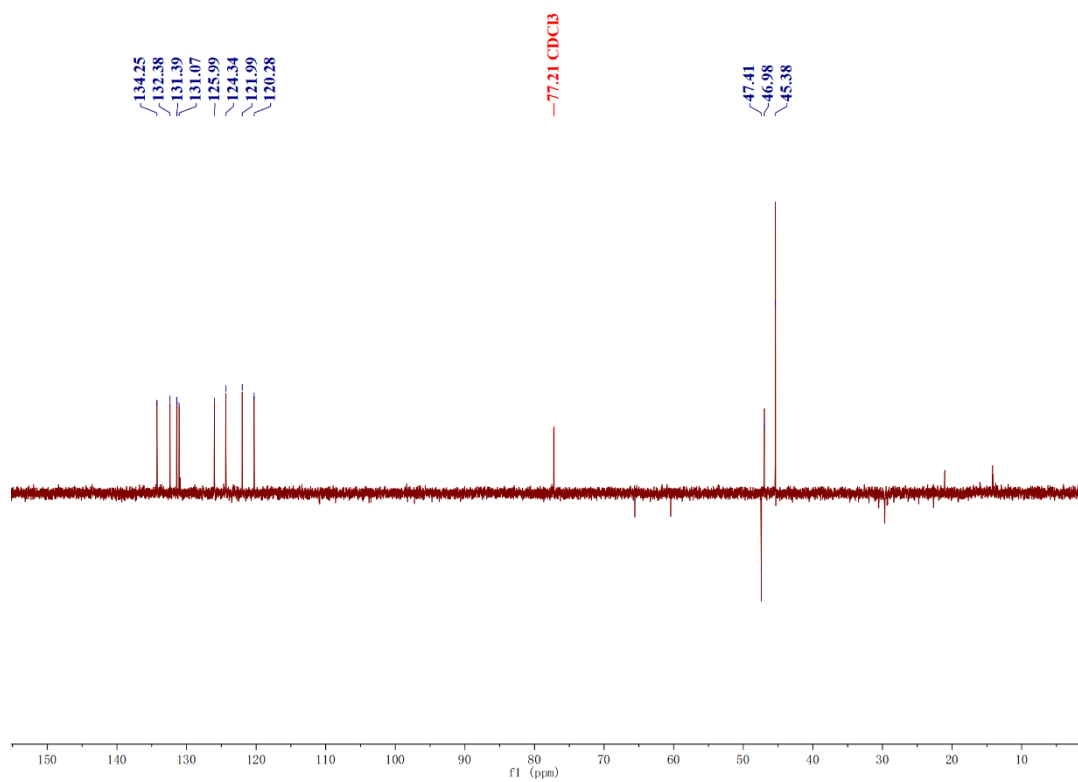

**Figure S16.** COSY spectrum of pseudofisnin A (**1**) in CDCl<sub>3</sub>.

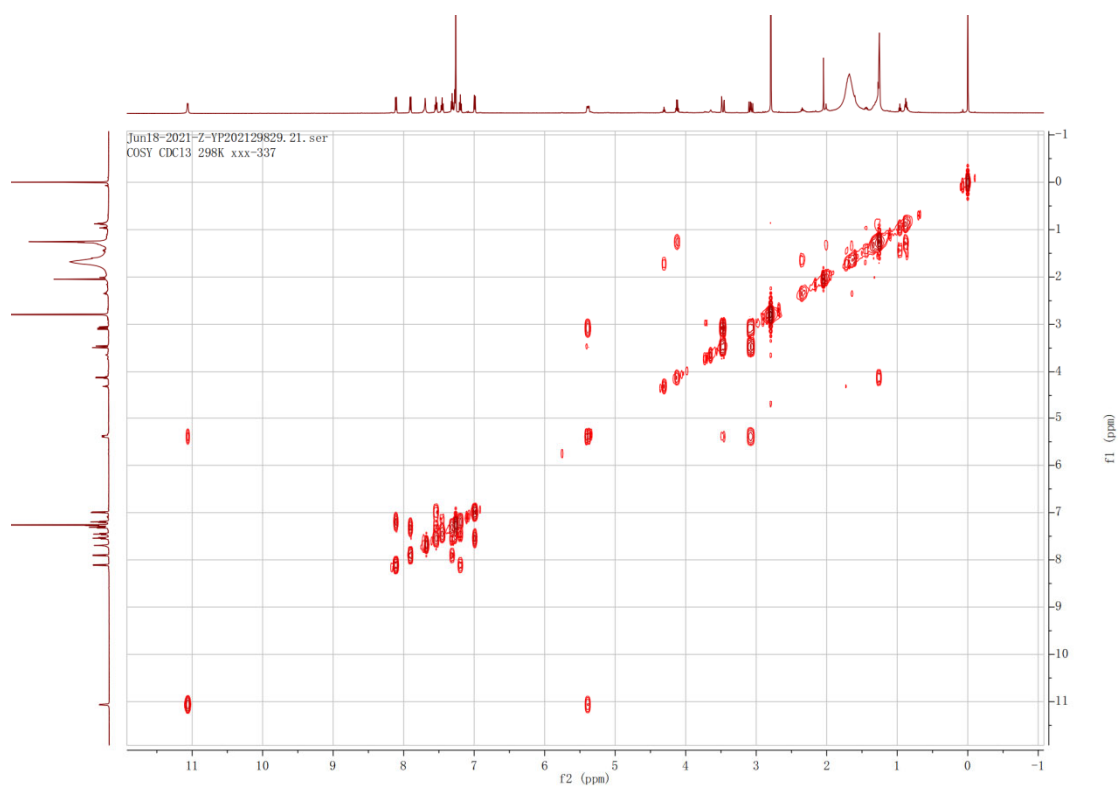

**Figure S17.** HSQC spectrum of pseudofisnin A (**1**) in CDCl<sub>3</sub>.

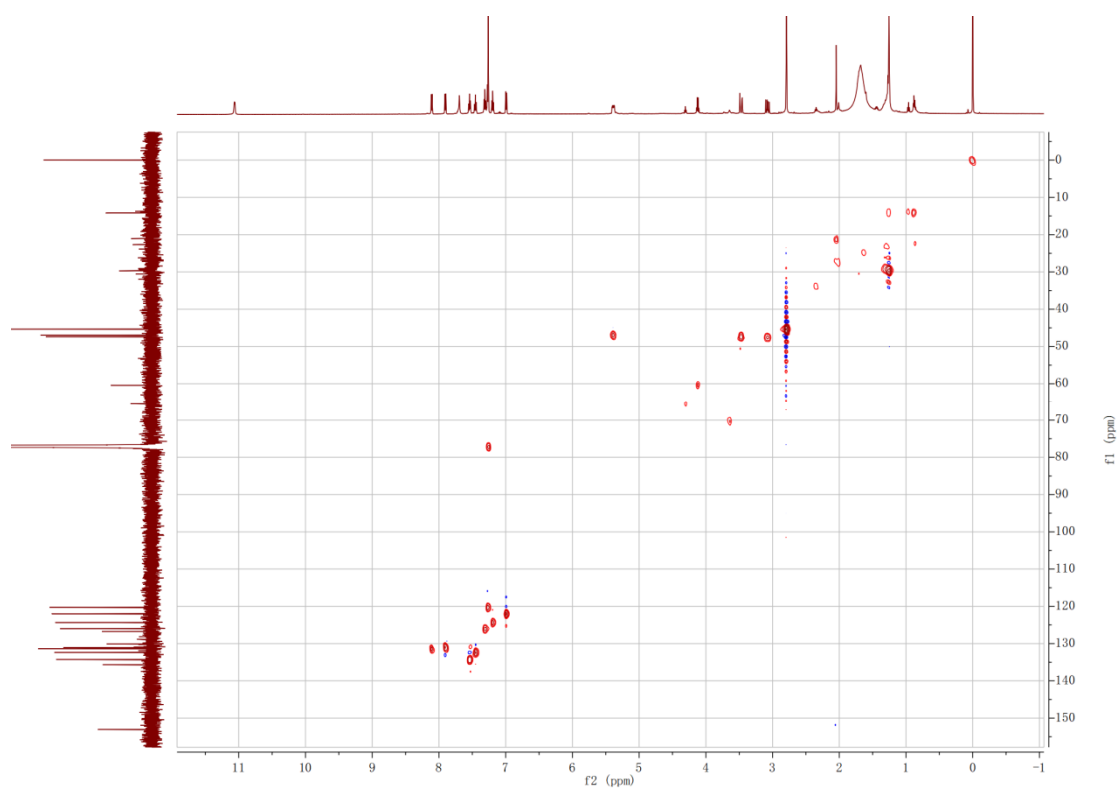

**Figure S18.** HMBC spectrum of pseudofisnin A (**1**) in CDCl<sub>3</sub>.

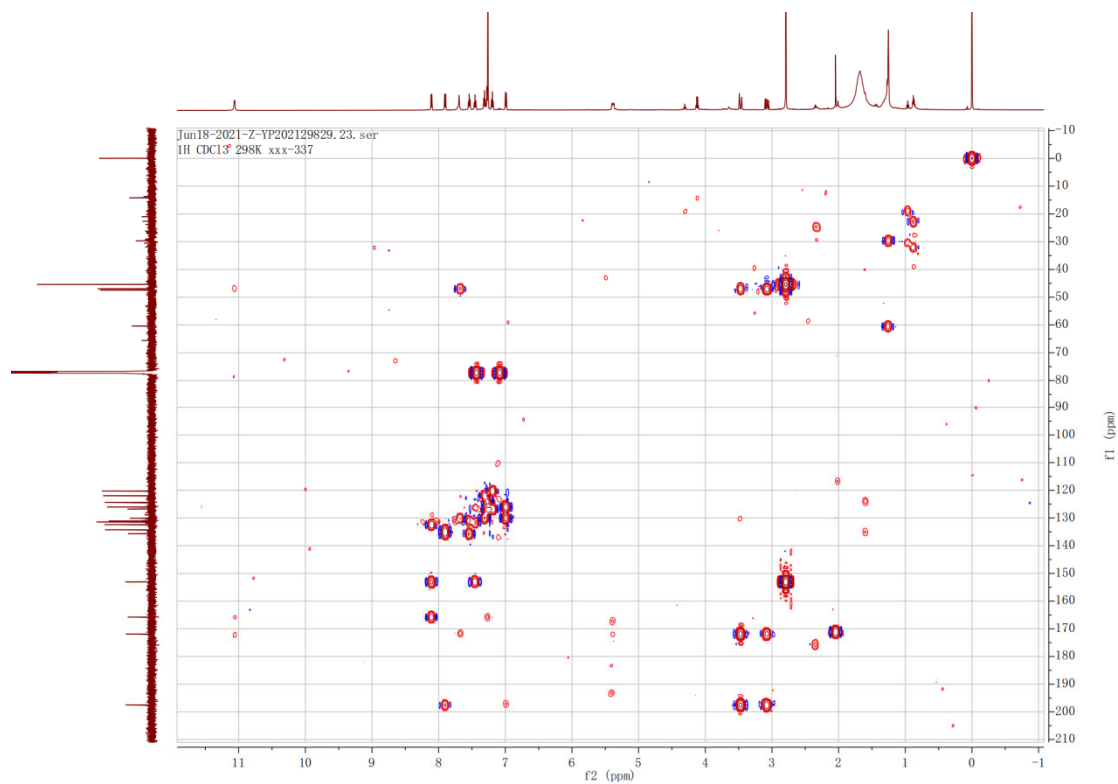

Supplement: s1 [file s1]
